# Supplementary material for: Cross-coupling of alkyl halides with aryl or alkyl Grignards catalyzed by dinuclear Ni(ii) complexes containing functionalized tripodal amine-pyrazolyl ligands
Source: Royal Society of Chemistry journal article supplement (doi:10.1039/c3dt32111h), 2013-01-01
Supplement: c3dt32111h.pdf [file c3dt32111h.pdf]

## Supplementary Information

### Cross-Coupling of Alkyl Halides with Aryl or Alkyl Grignards Catalyzed by Dinuclear Ni(II) Complexes Containing Functionalized Tripodal Amine-Pyrazolyl Ligands

Fei Xue,<sup>a</sup> Jin Zhao<sup>\*a,b</sup> and T. S. Andy Hor<sup>\*a,b</sup>

<sup>a</sup> Department of Chemistry, National University of Singapore, 3 Science Drive 3, Singapore 117543, Singapore. E-mail: andyhor@nus.edu.sg; chmzhaoj@nus.edu.sg

<sup>b</sup> Institute of Materials Research and Engineering, Agency for Science, Technology and Research, 3 Research Link, Singapore 117602, Singapore

#### ESI-MS spectra

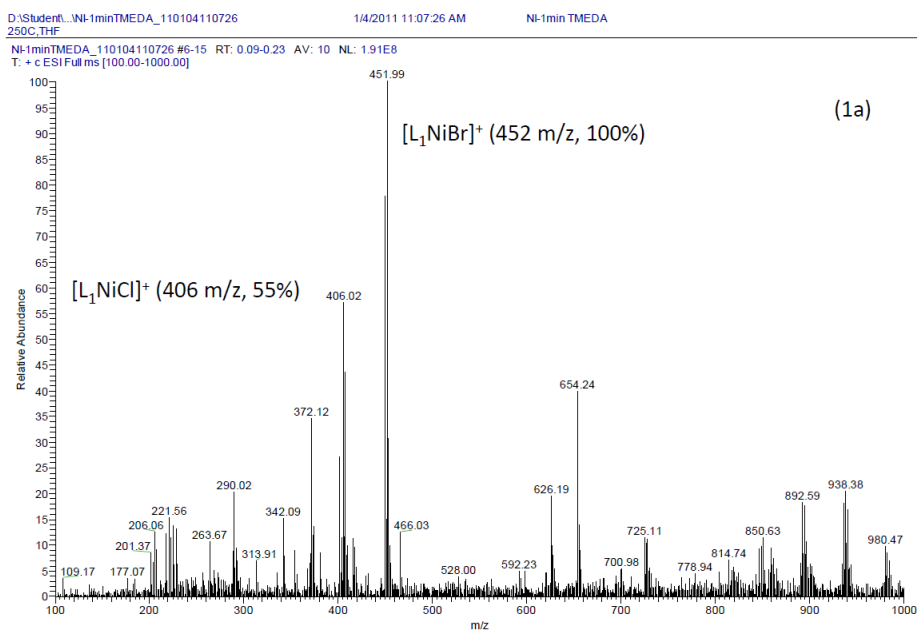

G:\NI-5minTMEDA\_110104105824  
200C,CH3CN

1/4/2011 10:58:24 AM

NI-5minTMEDA

NI-5minTMEDA\_110104105824 #6-8 RT: 0.10-0.13 AV: 3 NL: 1.37E8  
T: + c ESI Full ms [100.00-1000.00]

(1b)

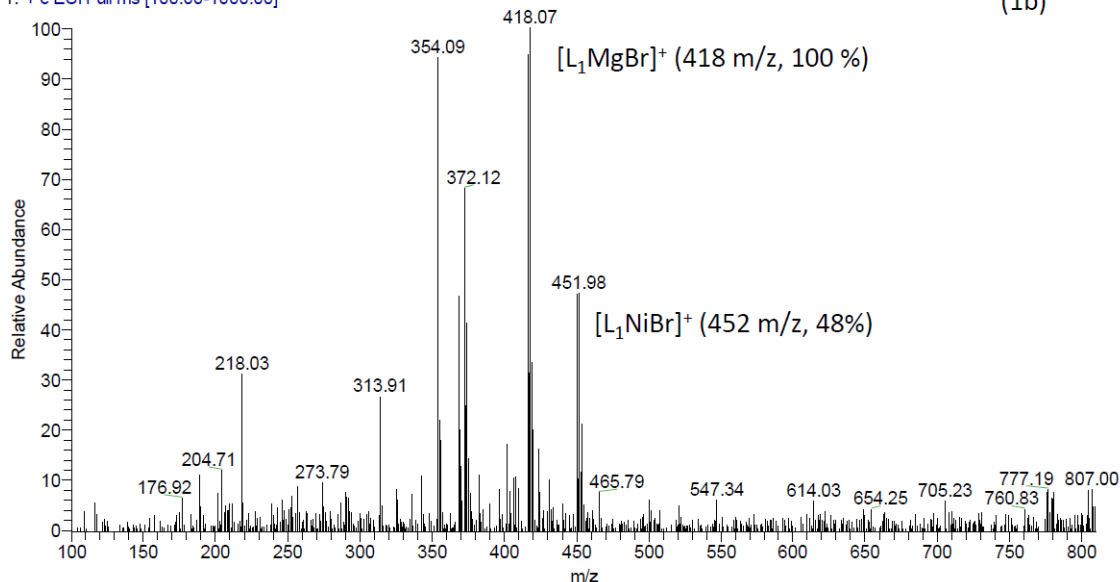

G:\NI-15minTMEDA  
250C,THF

1/4/2011 11:23:59 AM

NI-15minTMEDA

NI-15minTMEDA #19-24 RT: 0.31-0.39 AV: 6 NL: 1.06E8  
T: + c ESI Full ms [100.00-1000.00]

(1c)

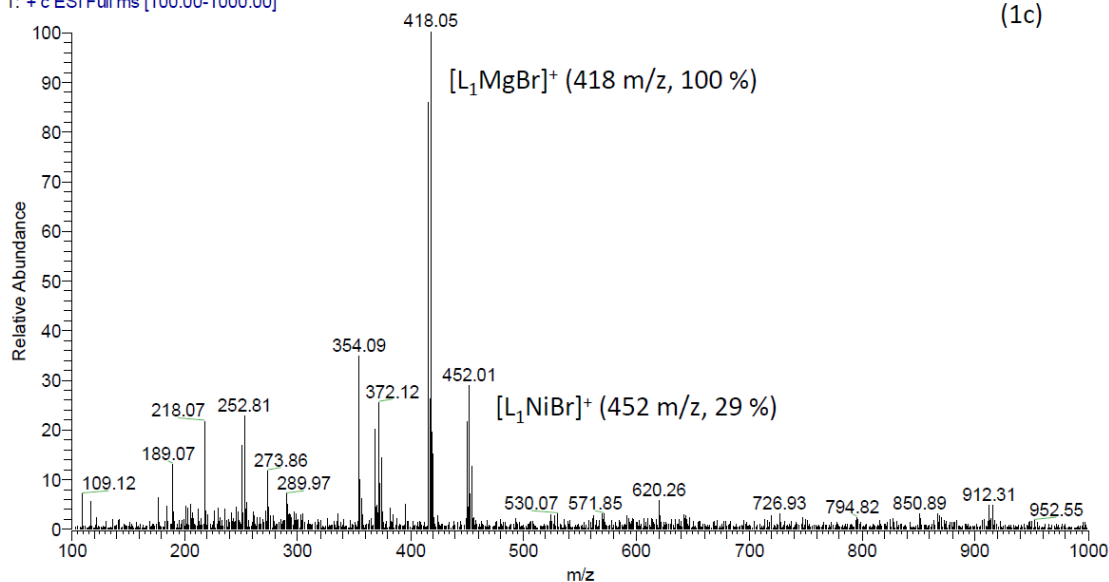

**Figures 1a-c:** The positive mode ESI-MS spectra of the reaction mixture after PhMgBr (1.0 mmol) with TMEDA (0.3 mmol) in 3 mL THF was added dropwise to the mixture of 1-bromooctane (0.5 mmol) and 5 mol % of **1** in 1mL THF at r.t for 1 min (1a), 5 min (1b) and 15 min (1c).

D:\Student\XUE FEM1-1minnew  
THF\_200C

2/7/2011 11:08:02 AM

1-1minnew

1-1minnew #4 RT: 0.11 AV: 1 NL: 1.38E8  
T: + c ESI Full ms [50.00-2000.00]

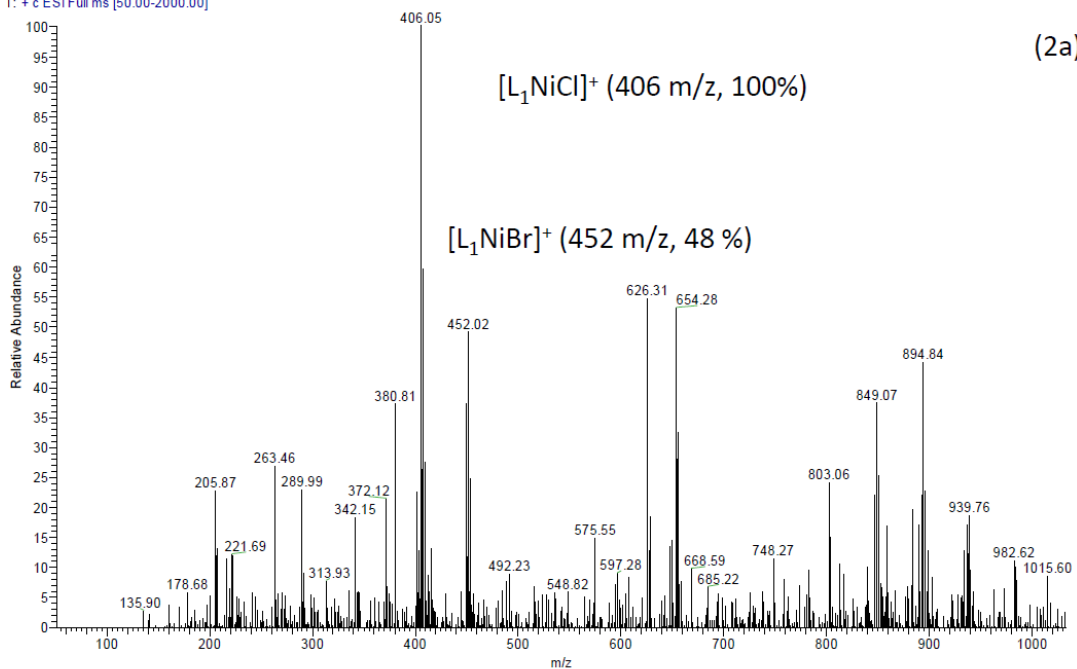

D:\Student\XUE FEM3-5minnew  
THF\_200

2/7/2011 2:57:08 PM

3-5minnew

3-5minnew #20 RT: 0.34 AV: 1 NL: 6.32E7  
T: + c ESI Full ms [50.00-1000.00]

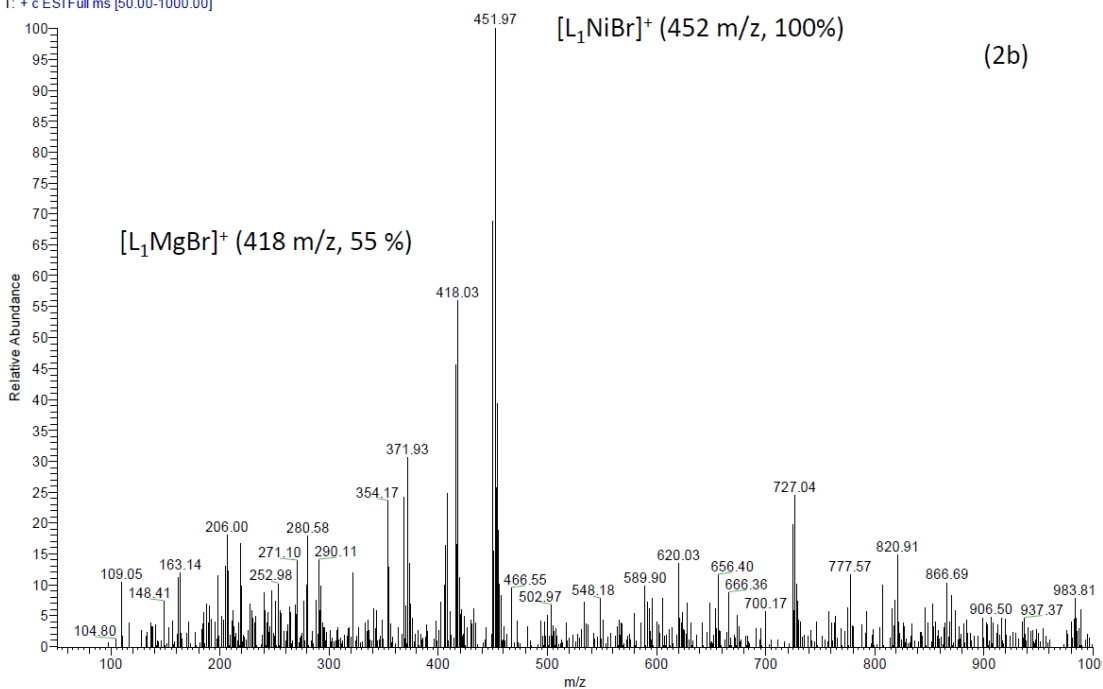

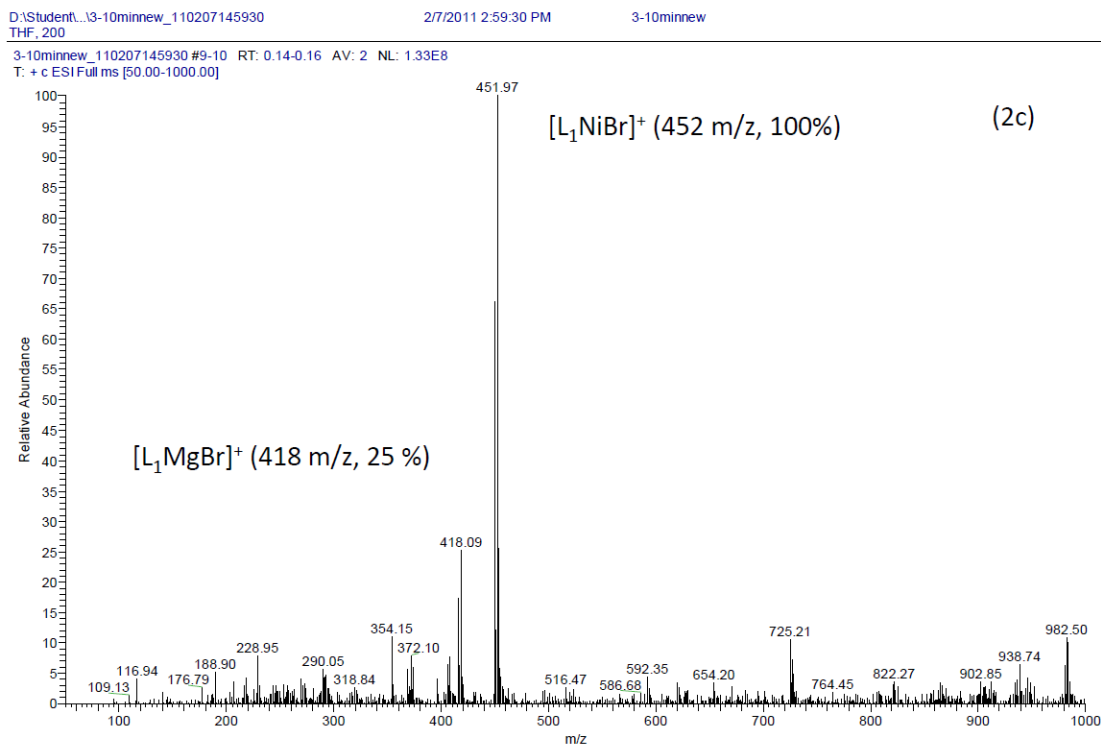

**Figures 2a-c:** The positive mode ESI-MS spectra of the reaction mixture after PhMgBr (1.0 mmol) (without any additives) in 3 mL THF was added dropwise to the mixture of 1-bromooctane (0.5 mmol) and 5 mol % of **1** in 1mL THF at r.t for 1 min (2a), 5 min (2b) and 10 min (2c).

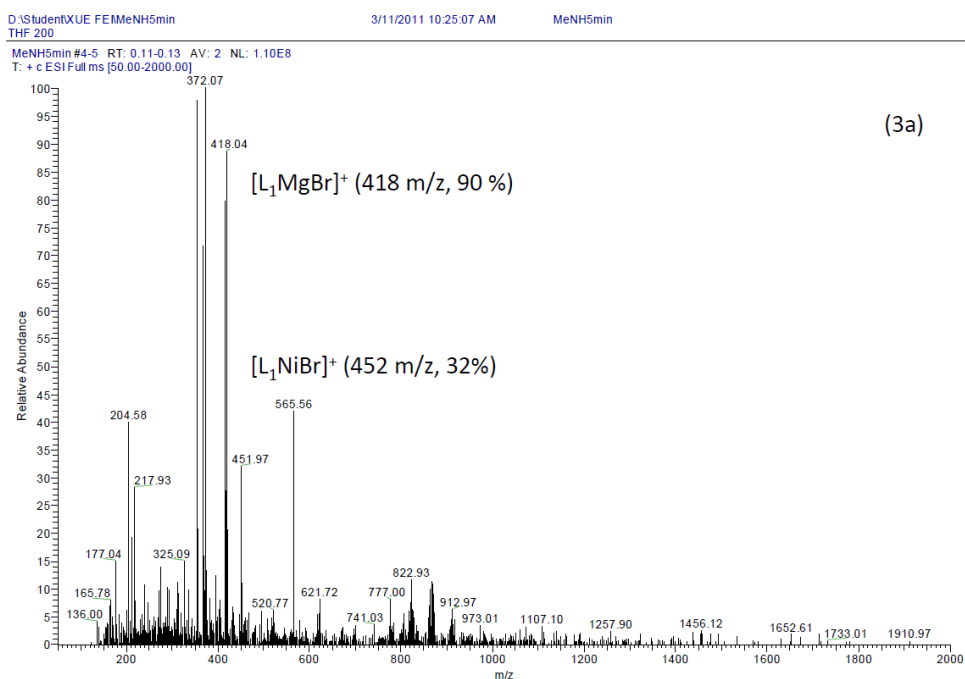

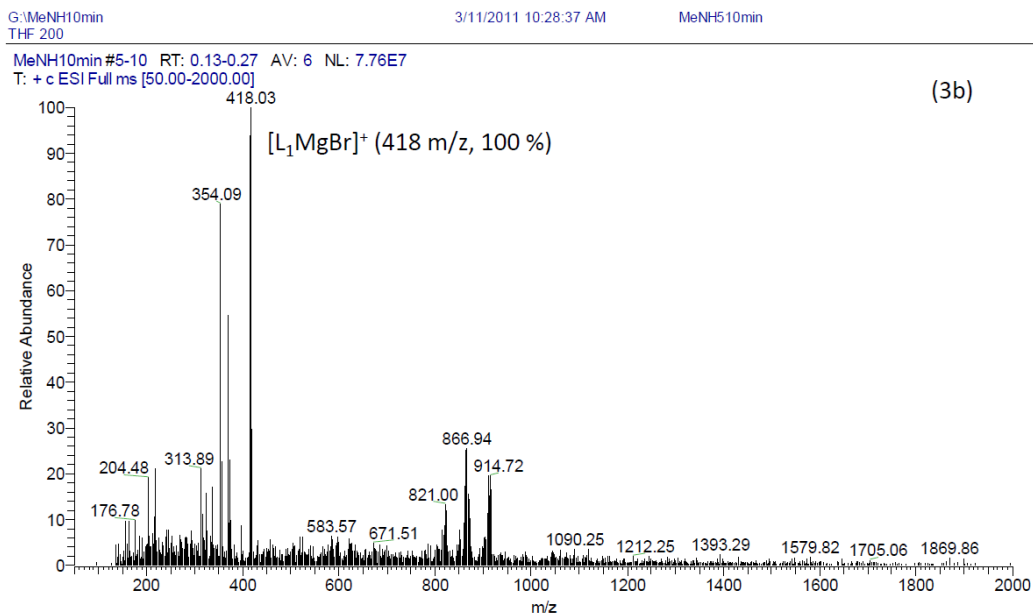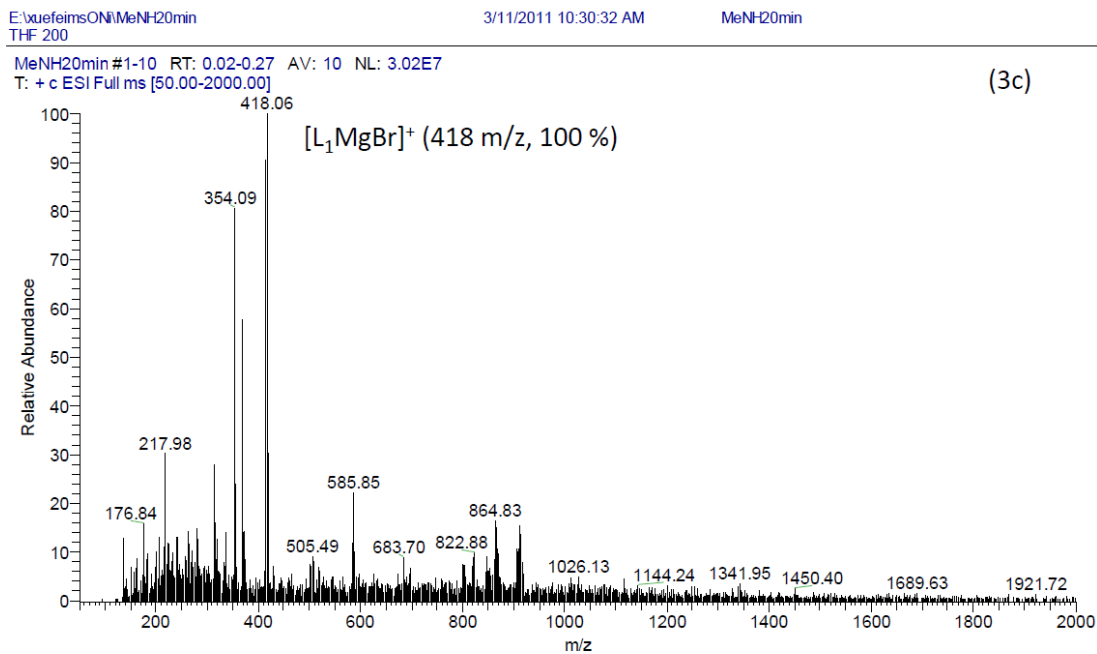

**Figures 3a-c:** The positive mode ESI-MS spectra of the reaction mixture after PhMgBr (1.0 mmol) with DMEDA (0.3 mmol) in 3 mL THF was added dropwise to the mixture of 1-bromooctane (0.5 mmol) and 5 mol % of **1** in 1 mL THF at r.t for 5 min (3a), 10 min (3b) and 25 min (3c).
